# Supplementary material for: Genetic and epigenetic features direct differential efficiency of Xist-mediated silencing at X-chromosomal and autosomal locations
Source: PubMed Central journal article supplement (PMC5612955; doi:10.1038/s41467-017-00528-1), 2017-09-25
Supplement: 41467_2017_528_MOESM1_ESM.pdf [file 41467_2017_528_MOESM1_ESM.pdf]

### **Description of Supplementary Files**

File Name: Supplementary Information

Description: Supplementary Figures and Supplementary Tables

File Name: Peer Review File

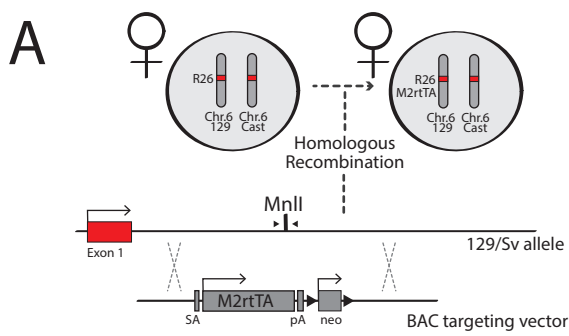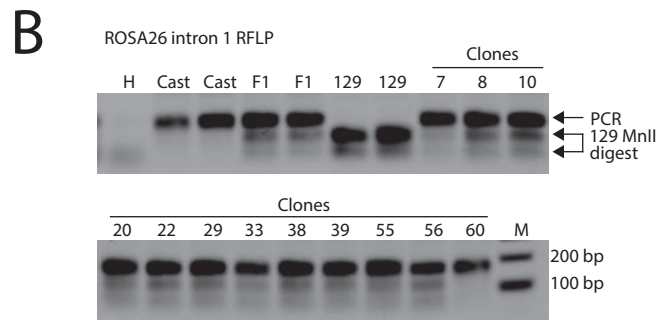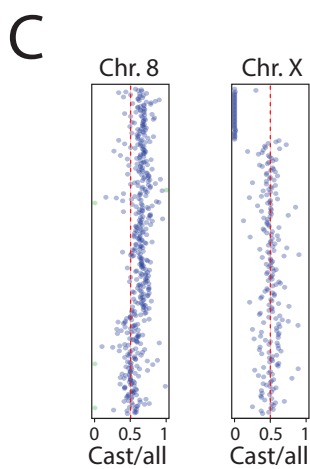

**Supplementary Figure 1, Related to Figure 1.**

(A) Targeting strategy to generate hybrid F1 2-1 ESC lines constitutively expressing the reverse tetracycline transactivator M2rtTA. M2rtTA has been targeted at the ROSA26 locus together with a neomycin/kanamycin resistance cassette flanked by lox sites. SA, slice acceptor; pA, polyadenylation sequence. (B) PCR-RFLP analysis with primers indicated in Figure S1A spanning a MnlI RFLP discriminating between the Cast/Ei (no MnlI site) and the 129/Sv (MnlI site) alleles, which was used to target the M2rtTA cassette. Correct targeting of the M2rtTA cassette results in loss of 129/Sv specific restriction products, as shown for clone 60. Arrows on right indicate size of PCR product and size of MnlI restriction fragments. F1, F1 2-1 polymorphic 129/Sv-Cast/Ei mother cell line; M, marker; H, water. (C) Mapping of X;8 translocation breakpoint by allele-specific RNA-seq analysis. The distal two-thirds of chromosome 8 are duplicated in the X;8 translocation product whereas 15 Mb of the telomeric end of the 129/Sv X chromosome is lost.

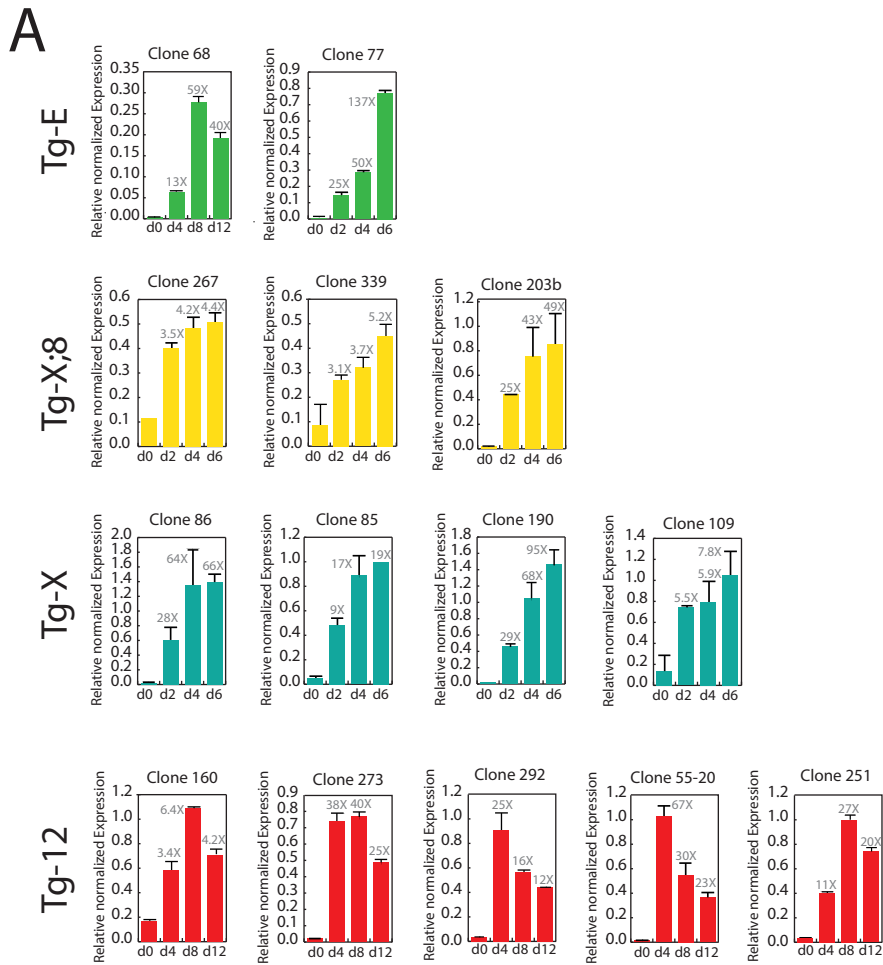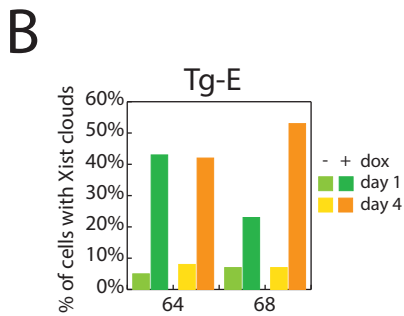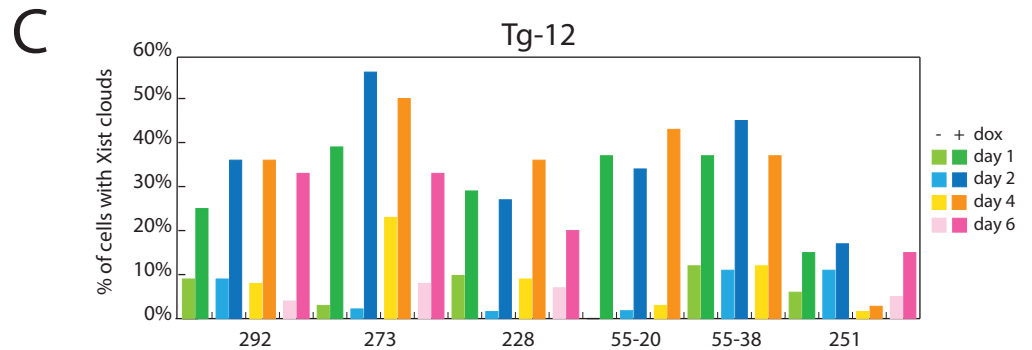

**Supplementary Figure 2, Related to Figure 2.**

(A) qPCR quantification of Xist RNA expression level in doxycycline untreated cells at different time points upon neuronal differentiation. Mean and SD of two independent differentiation experiments are shown for clones Tg-E (68, 77), Tg-X (86, 85, 190, 109), Tg-X;8 (203b, 267, 339) and Tg-12 (160, 273, 292, 55-20, 251). Fold enrichment relative to day 0 is shown per every tested time point of neuronal differentiation. (B and C) Quantification of cells showing an Xist-coated chromosome at different time points after doxycycline induction. Data related to Tg-E (64, 87) and Tg-12 (292, 273, 228, 55-20, 55-38, 251) clones is shown.  $n > 150$  nuclei counted per time point. Higher levels of Xist-coated chromosomes in doxycycline untreated clones compared to Figure 2F is due to serum+Lif culturing conditions used in this experiment versus 2i conditions (Ying et al., 2008) used in Figure 2F.

A

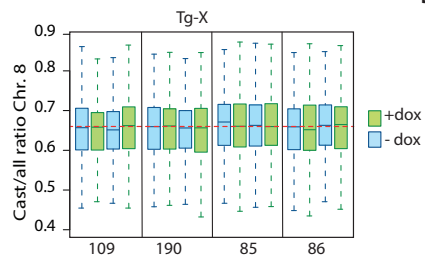

B

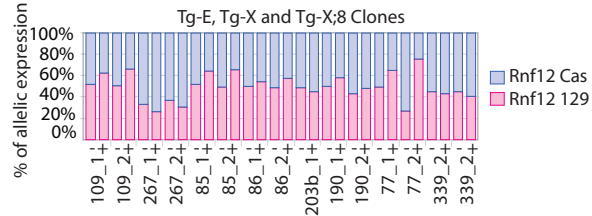

C

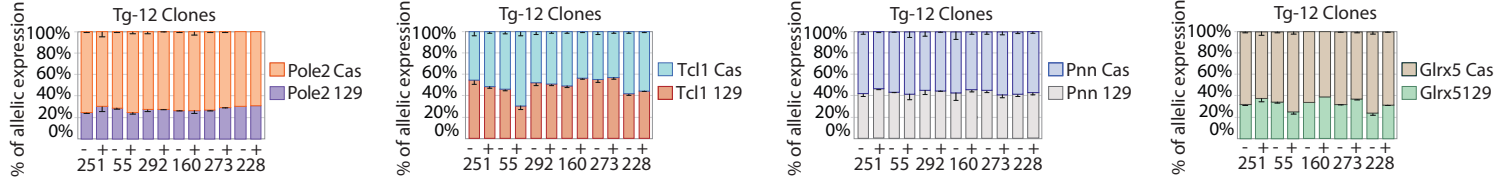

D

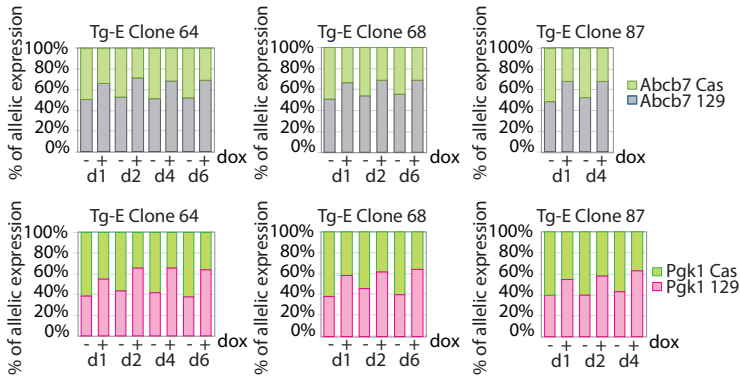

E

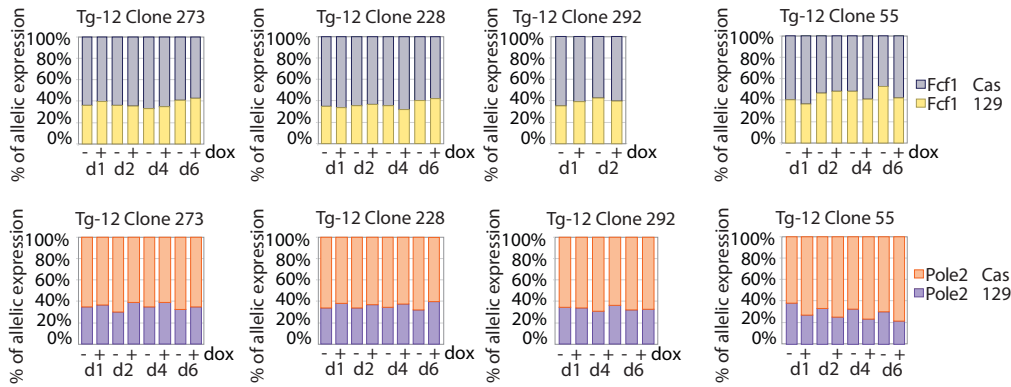

F

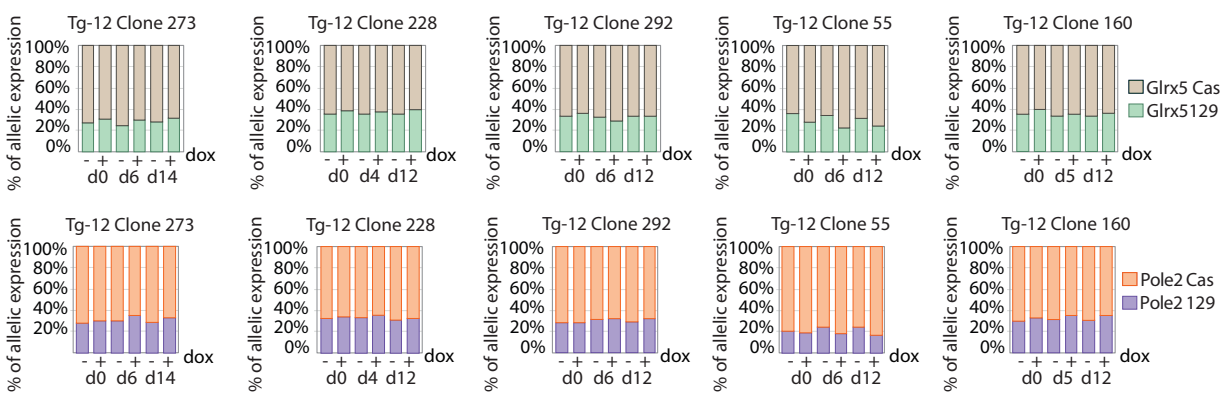

G

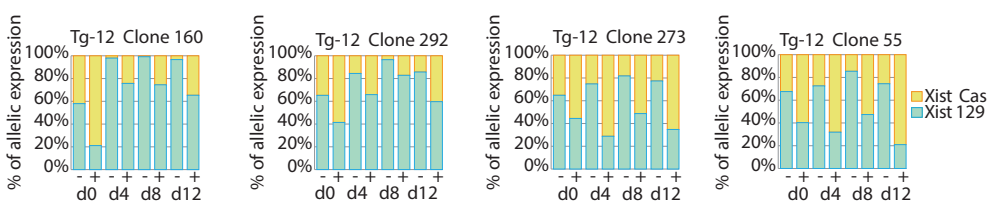

### Supplementary Figure 3, Related to Figure 3.

(A) Box plot showing the Cast- specific gene expression ratio of chromosome 8 genes in Tg-X clones (109, 190, 86, 85). (B and C) Validation of RNA-seq analysis by RT-PCR followed by pyrosequencing of Tg-X (86, 85, 109, 190), Tg-X;8 (203b, 267, 339), Tg-E (68, 87) and Tg-12 (160, 292, 55, 228, 273) clones maintained in 2i conditions. Expression data for *Tcl1*, *Pnn*, *Pole2*, *Glrx5* (Chr.12) and *Rnf12* (Chr.X) are shown. (D and E) RT-PCR analysis followed by pyrosequencing for Tg-E (64, 87, 68) and Tg-12 (273, 228, 292, 55) clones at different time points after Xist induction in ESCs maintained in conventional serum+Lif conditions. Data for *Abcb7*, *Pgk1* (Chr. X), *Fcf1* and *Pole2* (Chr.12) are shown. (F) RT-PCR analysis followed by pyrosequencing for Tg-12 clones (273, 228, 292, 55, 160) at different time points upon neuronal differentiation. Expression data for *Glrx5* and *Pole2* are shown. (G) Xist allele-specific qPCR of Tg-12 clones 160, 292, 273 and 55 at different time points upon neuronal differentiation.

**A**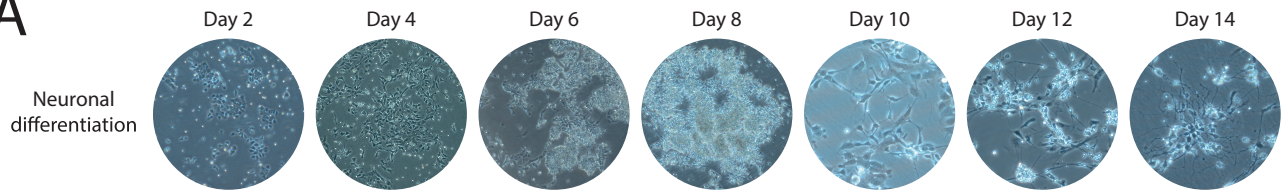**B**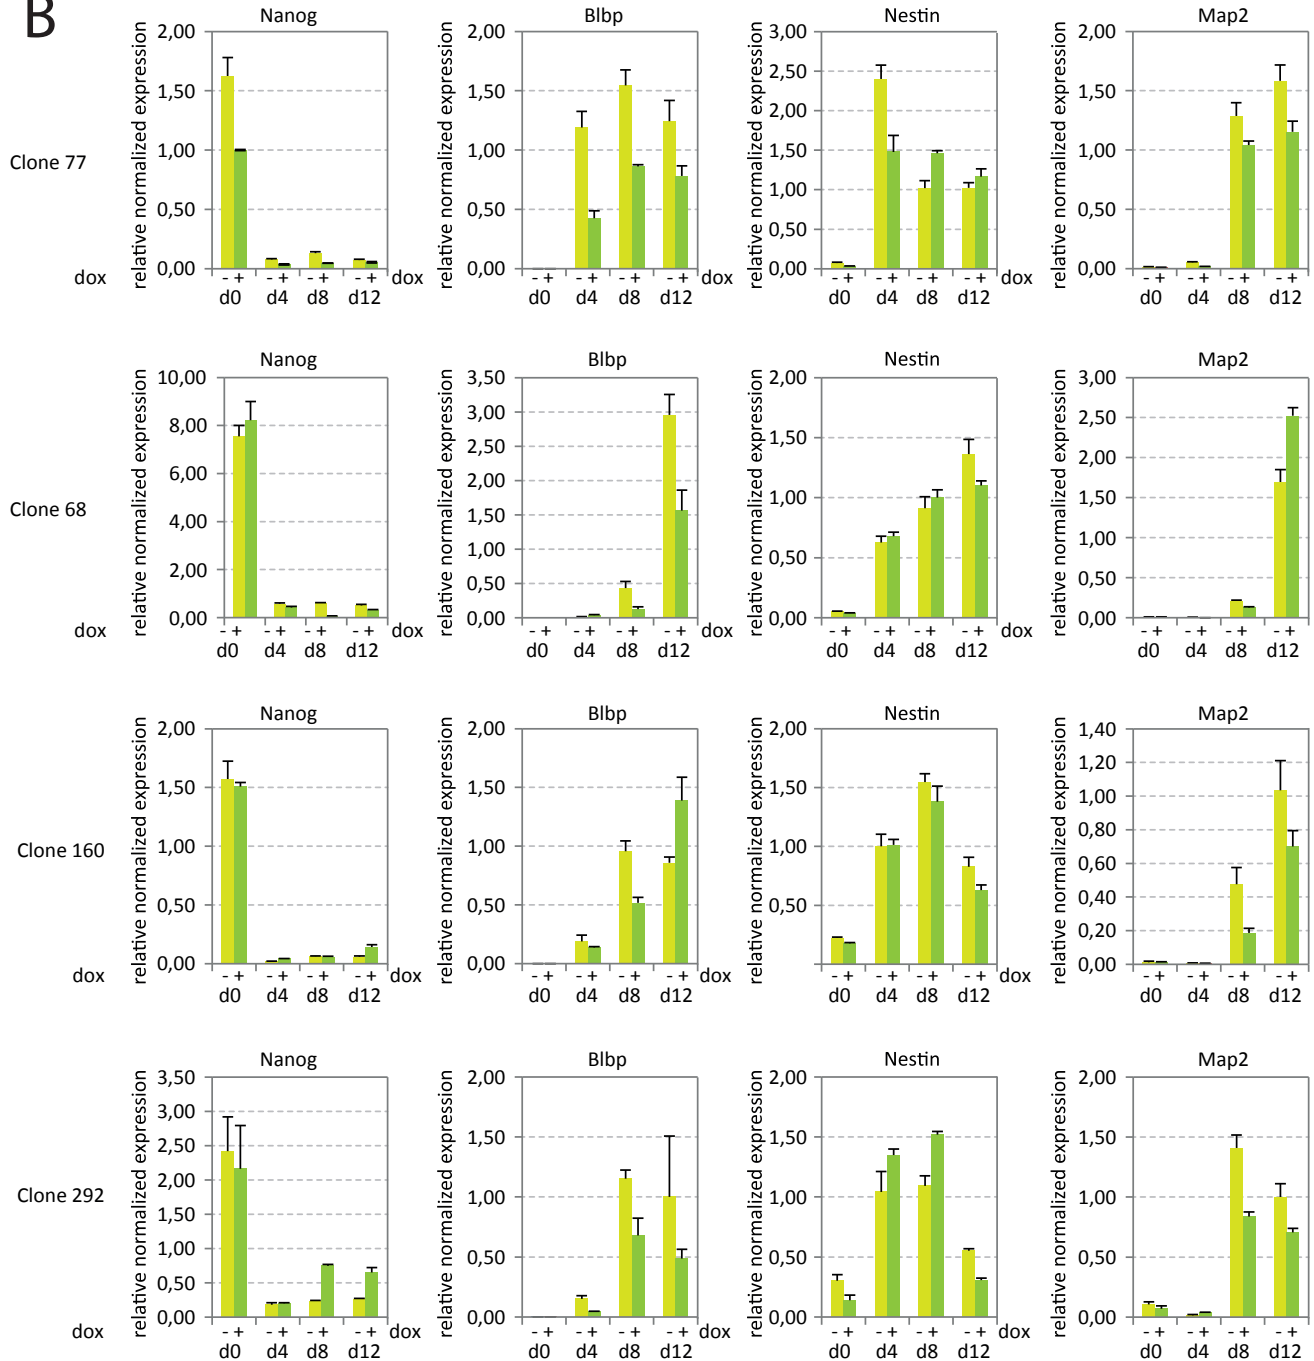**Supplementary Figure 4, Related to Figure 3.**

(A) Representative images of *in vitro* neuronal differentiation of F1 2-1 ESC lines. (B) qPCR analysis of Tg-E (77, 68) and Tg-12 (160, 292) clones at different time points upon neuronal differentiation. Data for *Nanog*, *Blbp*, *Nestin* and *Map2* are shown.

A

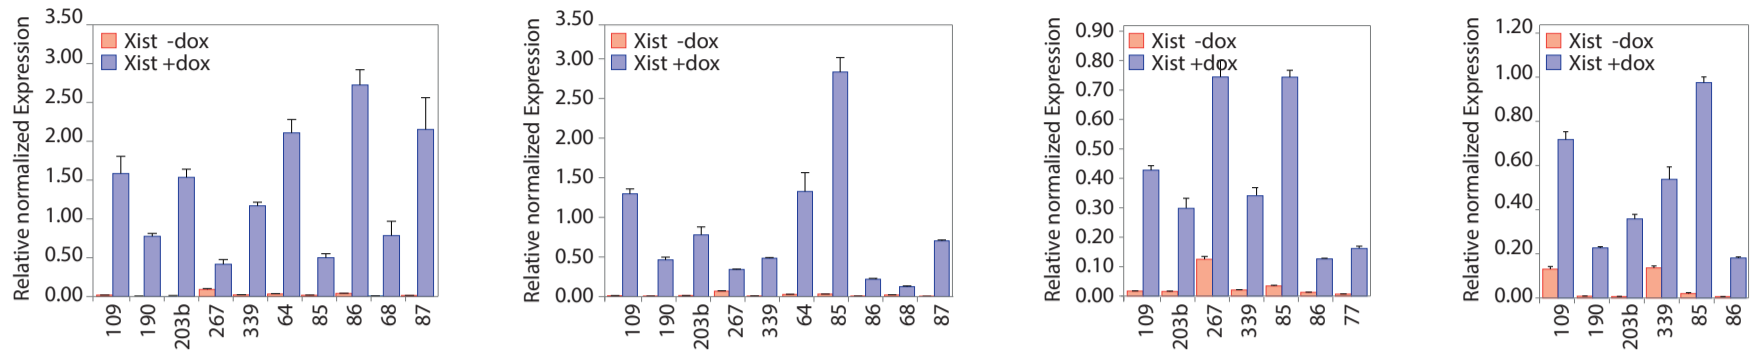

**Supplementary Figure 5**

(A) Xist qPCR analysis of Tg-E (87,68,77), Tg-X (109, 190, 86, 85) and Tg-X;8 (203B, 339, 267) clones after five days of doxycycline treatment prior to neuronal differentiation. Data of three to four independent experiments per clone are shown

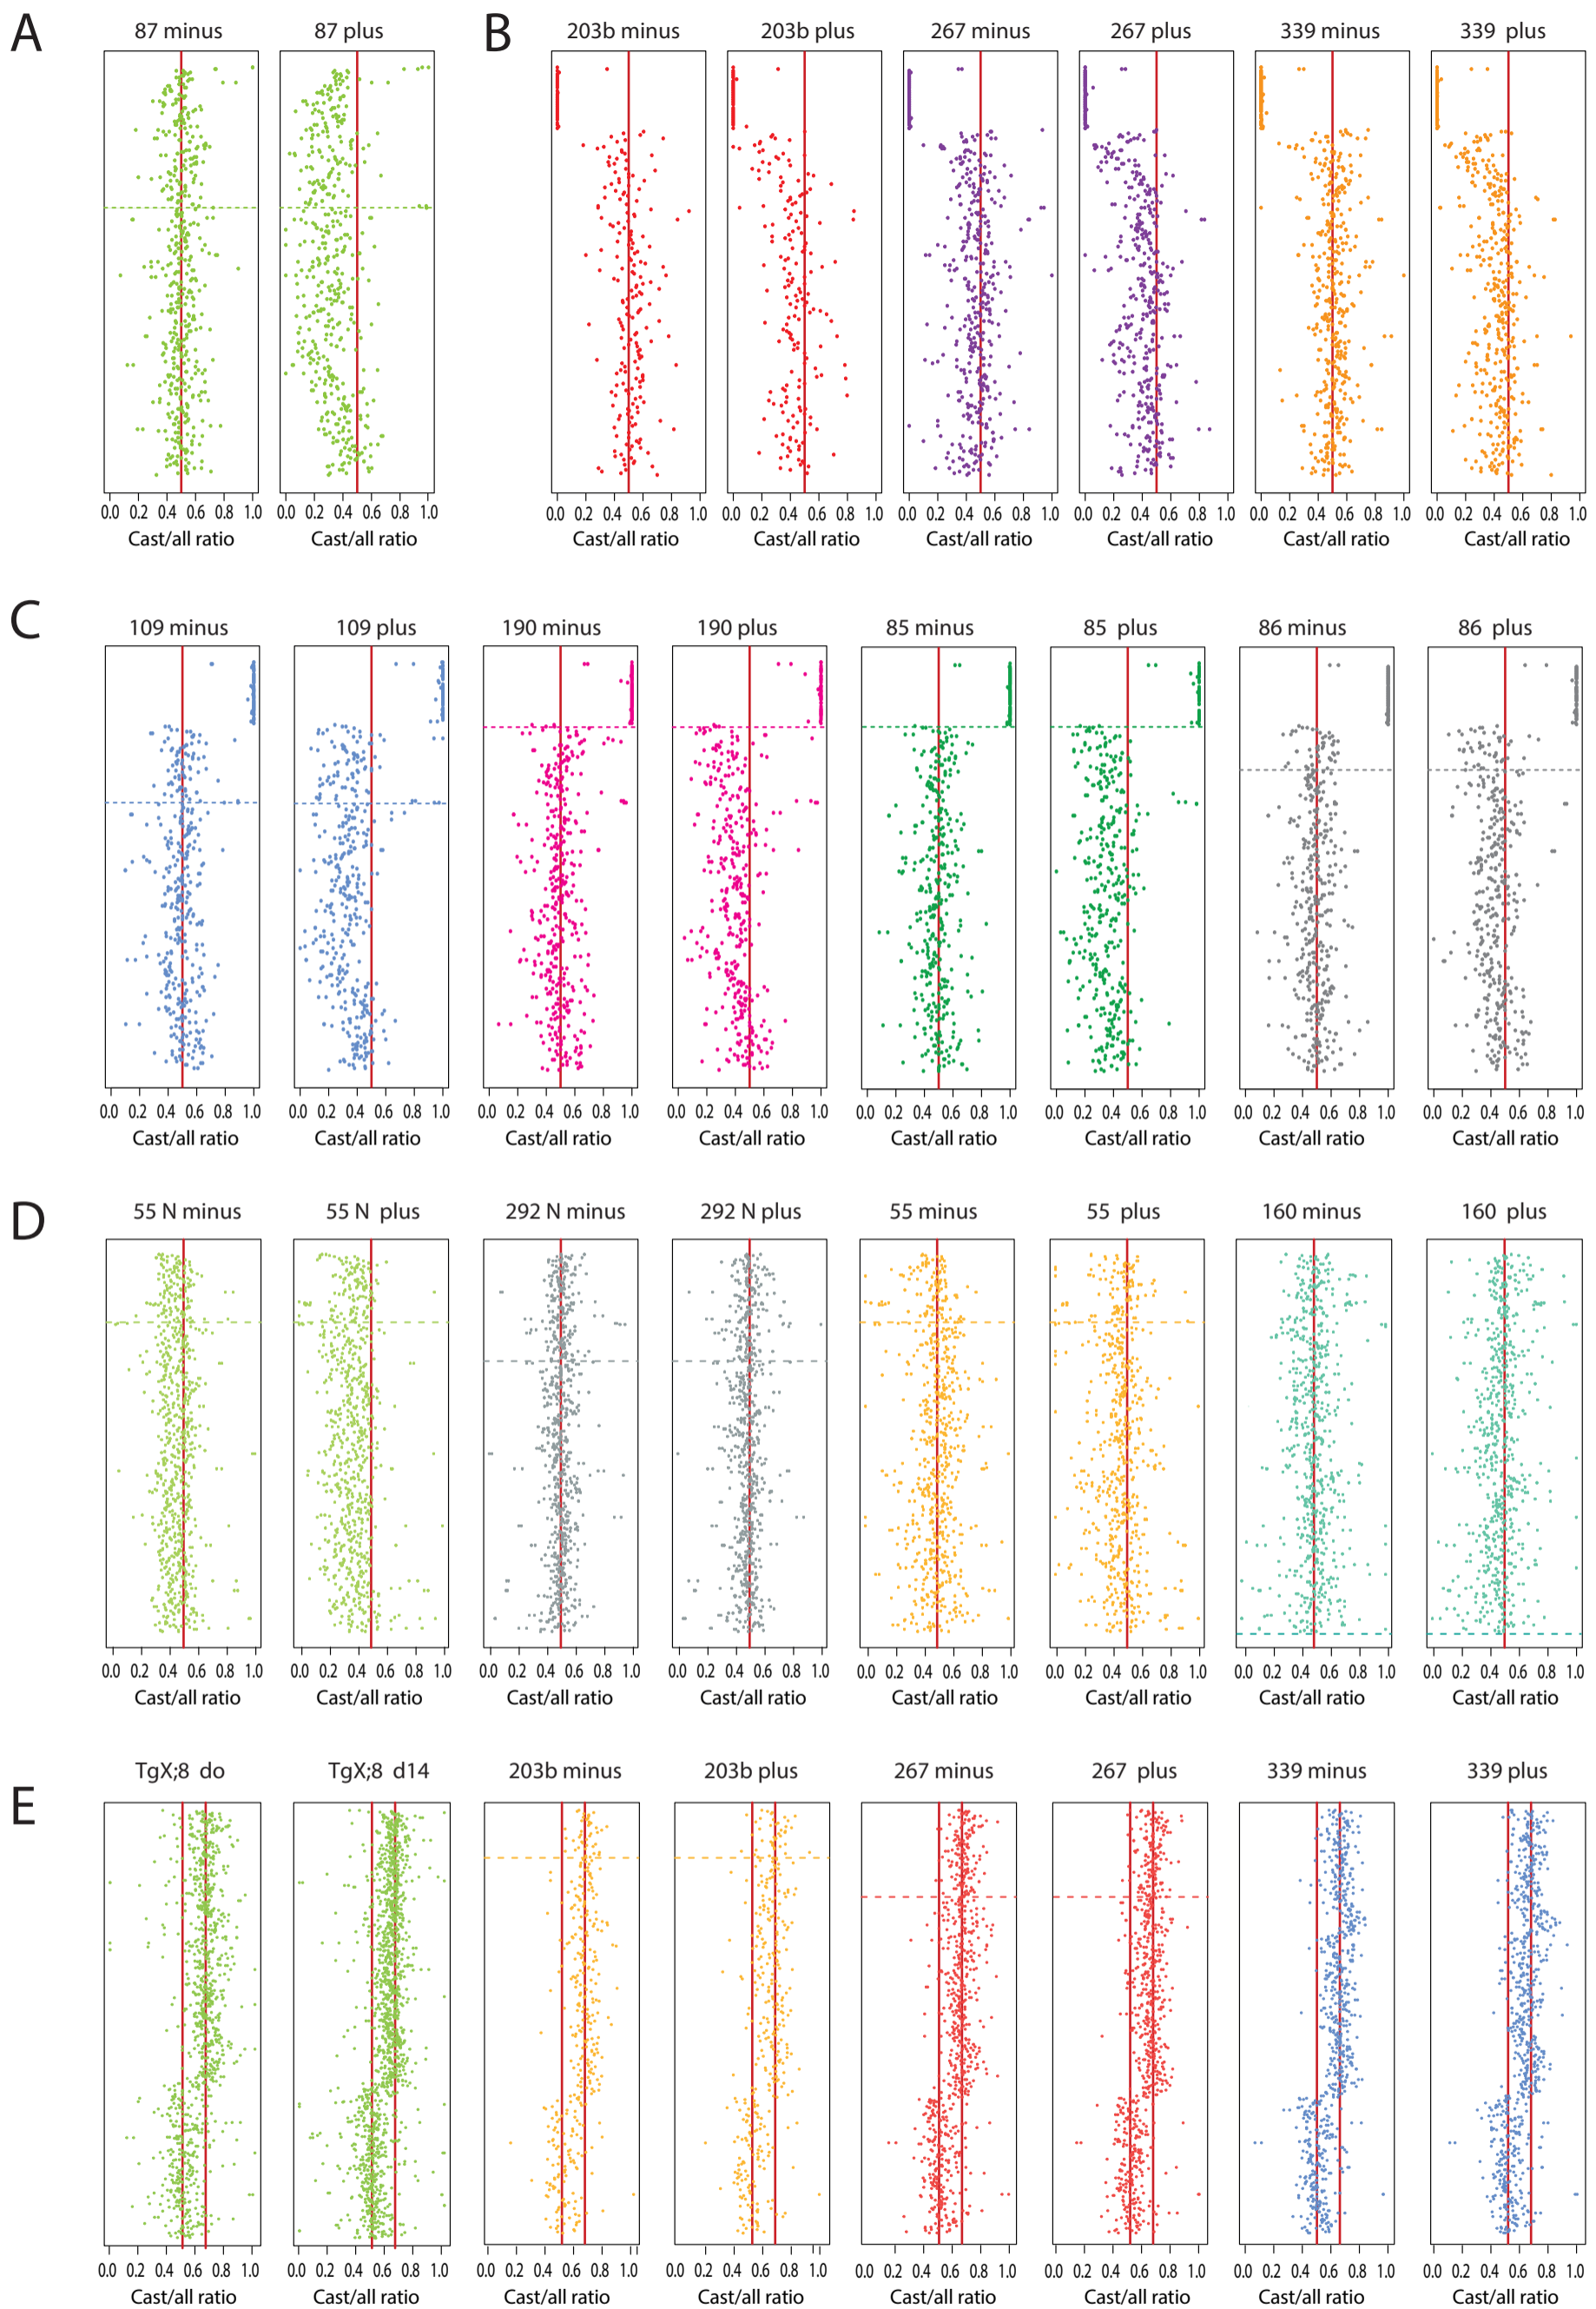

**Supplementary Figure 6, Related to Figure 5**

(A, B and C) Plots showing changes in Cast/all ratio of X-linked genes upon Xist induction in Tg-E, Tg-X;8 and Tg-X clones. (D and E) Plots showing changes in Cast/all ratio of chromosome 12 and 8 genes in Tg-12 and Tg-X;8 clones. Every dot represents a gene. Genes are ordered by genomic position on chromosomes X from telomeric (top) to centromeric (bottom) ends.



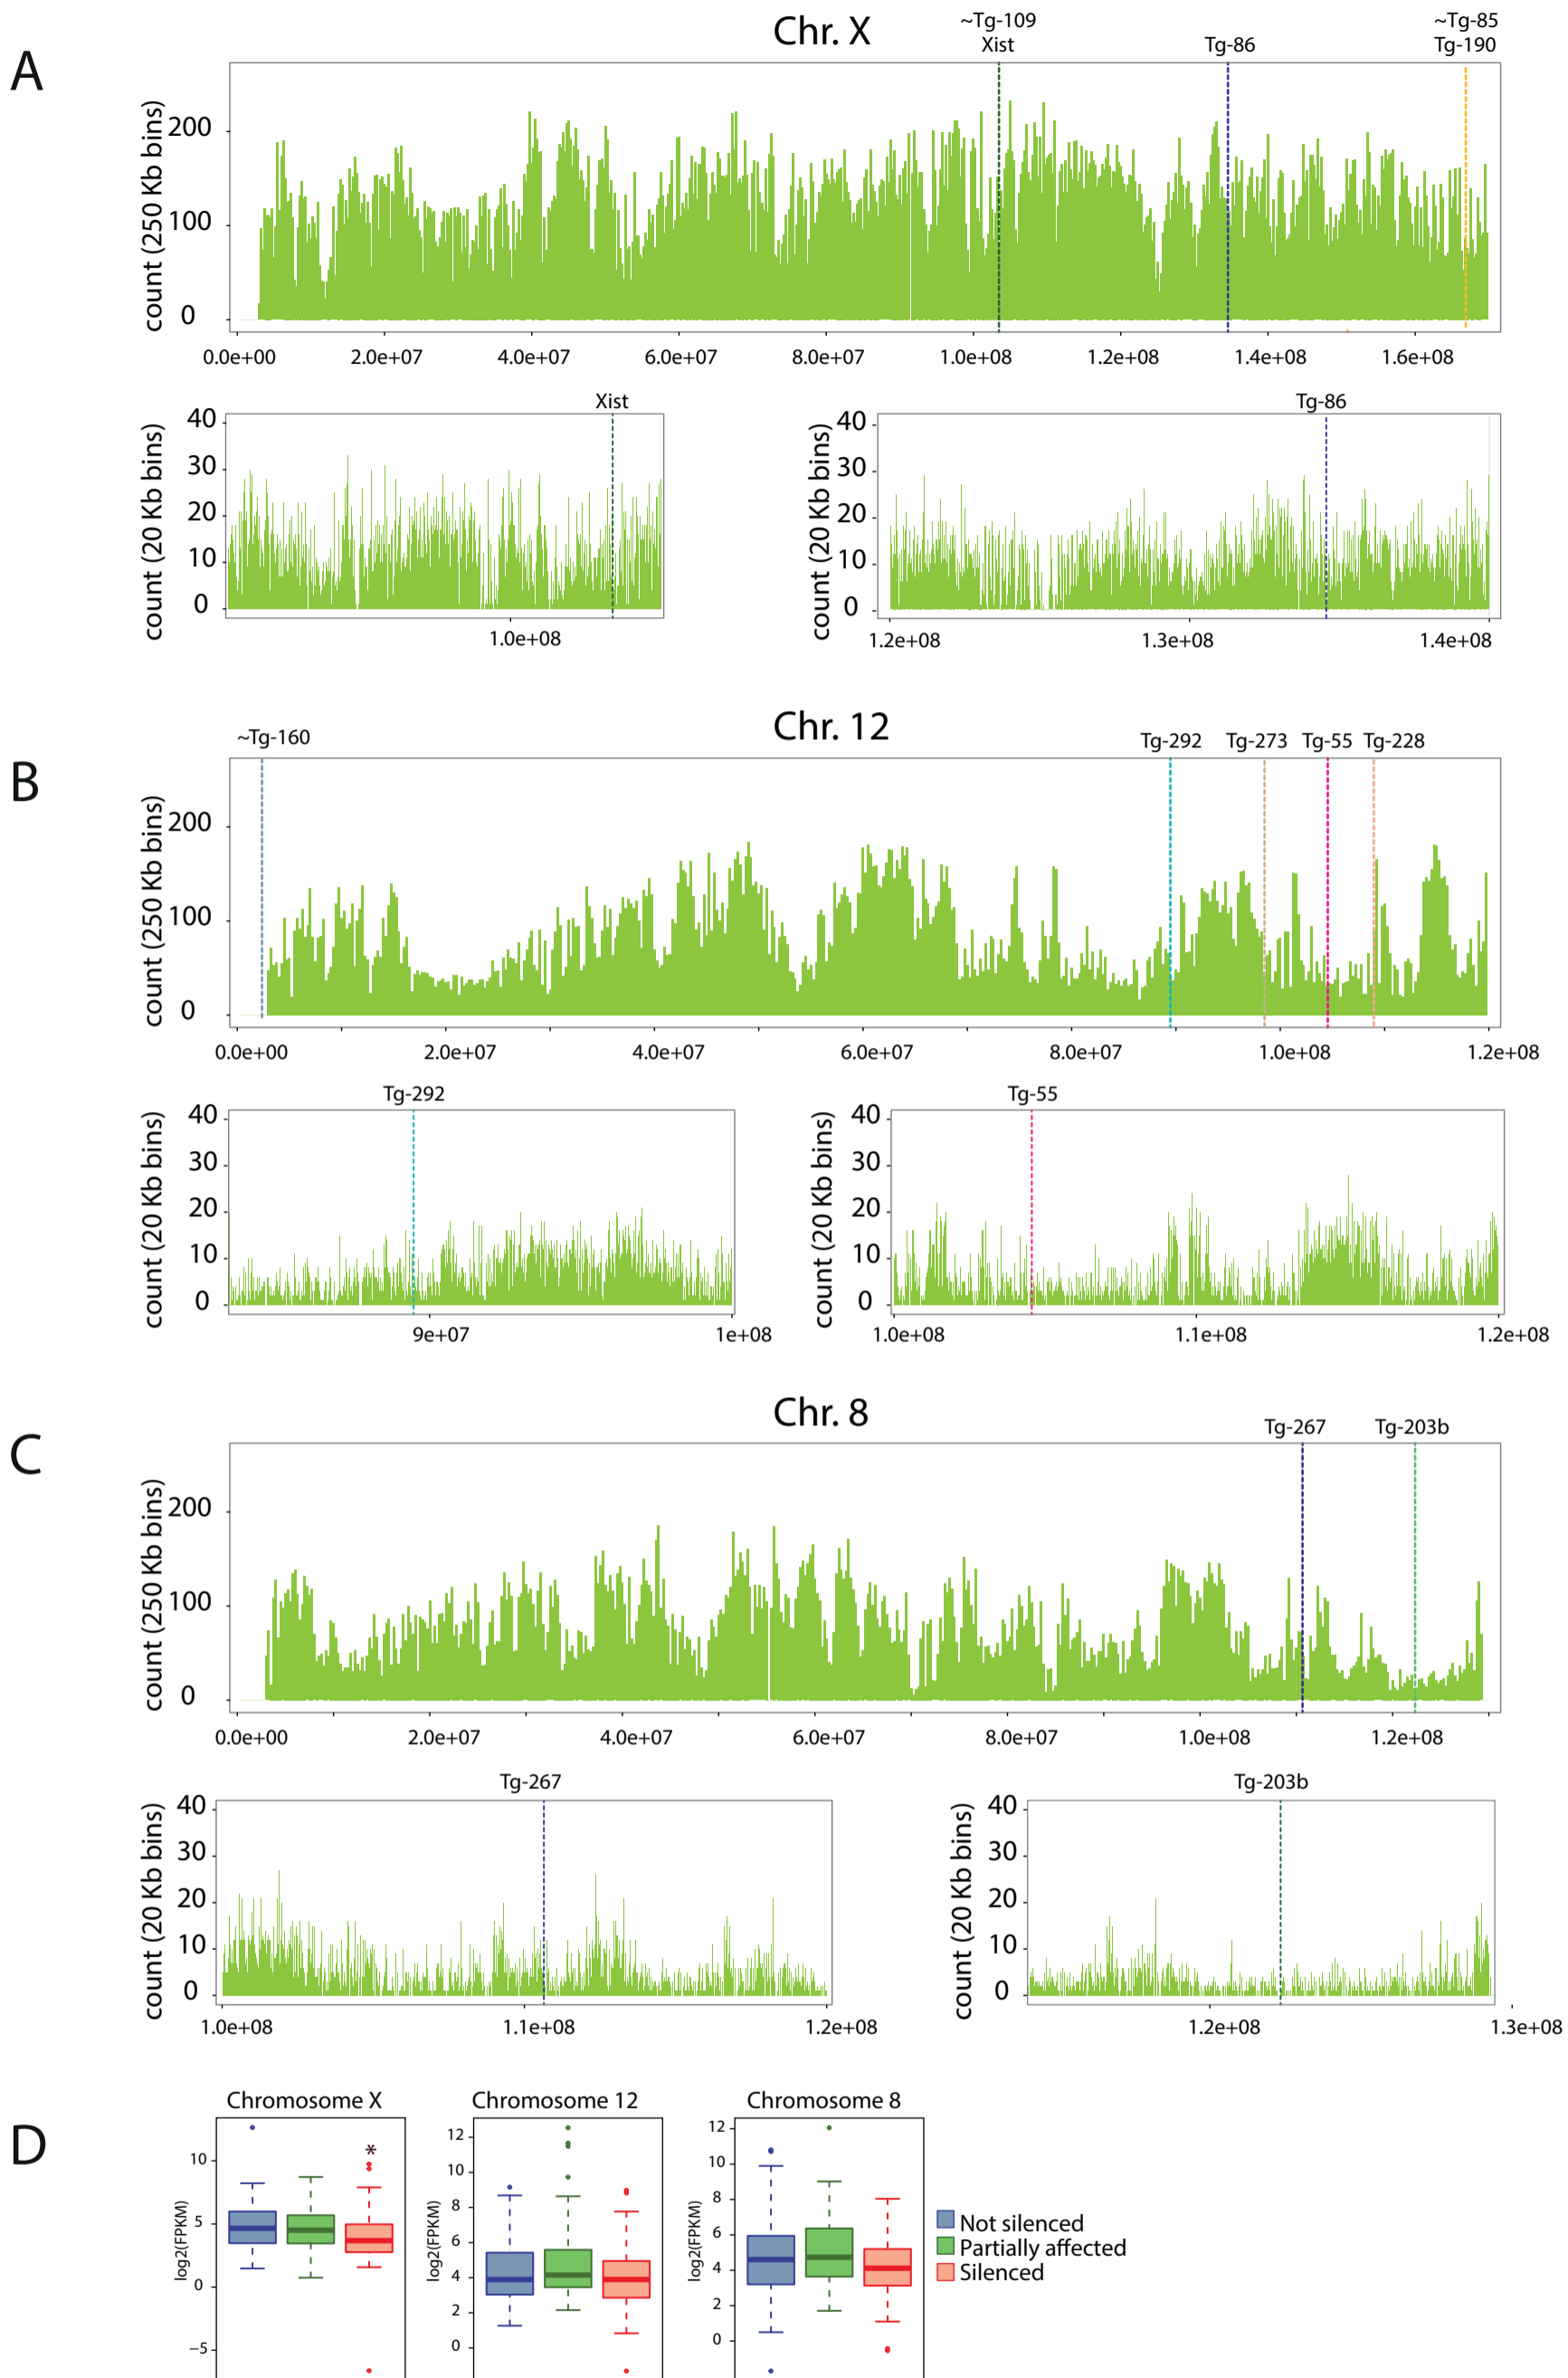

**Supplementary Figure 7, Related to Figure 6**

LINE density along the entire length of chromosomes X (A), 12 (B), and 8 (C) is shown. Green histogram bars represent 250 kb bins. Zoom in around the integration sites of Xist transgene are shown, histogram bars correspond to 20 kb bins. (D) Box plots showing gene expression of not silenced, partially affected and efficiently silenced X-linked and autosomal genes before ectopic Xist induction. \* $p < 0.05$  Wilcoxon rank-sum test relative to not silenced genes.

Supplementary Table 1

| OLIGO | SEQUENCE                         | DESCRIPTION                   |
|-------|----------------------------------|-------------------------------|
| 94    | ggtaccCAGCCATGTTTGCTCGTTT        | PTET XIST_3`ARM_KpnI F        |
| 95    | ggatccTAAACGCAGGTATCCGAGGT       | PTET XIST_3`ARM_BamHI R       |
| 96    | cactgtcggtcactgttcaga            | PTET XIST_5`ARM_F             |
| 97    | CACACAAAAGCATCACCAG              | PTET XIST_5`ARM_R             |
| 98    | ctgcagCCCCCTGAACCTGAAACATA       | Floxed NEO F                  |
| 99    | ctgcagAAGtctgggtcaagccattg       | Floxed NEO R                  |
| 119   | TGGGTCCTTGTTTCTTGACC             | PTET XIST 5`BB F k53__BAC_REC |
| 120   | TCCCTTTAGGGTTCGATT               | PTET XIST 5`BB R k53__BAC_REC |
| 121   | GCCATCACGAGATTTGATT              | PTET XIST 5`BB R k35__BAC_REC |
| 127   | ATCGCCTGGAGAATTCGAG              | PTET XIST 3`BB F__BAC_REC     |
| 128   | CGATGGGCAAAAGAAAAAGA             | PTET XIST 3`BB F__BAC_REC     |
| 90    | CGCGTCATGTCACTGAGCTT             | Xist targeting TspEI F__ES    |
| 91    | CGTTGCACGCCTTTAACTGA             | Xist targeting TspEI R__ES    |
| 114   | ATATAgcggccgcGGGCCTATTCTCAGTCCAG | 3`ARM ROSA26 F NotI           |
| 115   | CGATAGtctagaAGAATGCCATGAGTCAAGCC | 3`ARM ROSA26 R XbaI           |
| 116   | tagactGACGTcctgggggagtcgtttacc   | 5`ARM ROSA26 AatII F          |
| 117   | atctaaGAGCTCtttcgaggtcgatcgaggtc | 5`ARM ROSA26 SacI R           |
| 136   | TGAAAACACAAATGGCGTGT             | R26 BB 5`F__BAC_REC           |
| 137   | gcgaagagttgtcctcaacc             | R26 BB 5`R__BAC_REC           |
| 138   | caatggcttgaccagaCTT              | R26 BB 3`F__BAC_REC           |
| 139   | ACACACCAGAAGAGGGGCATC            | R26 BB 3`R__BAC_REC           |
| 156   | ggagagaggcattcatgggag            | R26_targeting_22__ES_REC      |
| 157   | ctttttgtgatcctttgccttgatcc       | R26_targeting_23__ES_REC      |

Primers used in this study to generate transgenic ES clones as described in the methods section

Supplementary Table 2

| OLIGO | SEQUENCE                 | DESCRIPTION                             |
|-------|--------------------------|-----------------------------------------|
| 160   | GGATCCTGCTTGAACACTGC     | Forward primer <i>Xist</i> expression   |
| 161   | CAGGCAATCCTTCTTCTTGAG    | Reverse primer <i>Xist</i> expression   |
| 162   | AACCCTAAGGCCAACCGTGAAAAG | Forward primer <i>Actin</i> expression  |
| 163   | CATGGCTGGGGTGTGAAGGTCTC  | Reverse primer <i>Actin</i> expression  |
| 327   | AACCAAAGGATGAAGTGCAAGCGG | Forward primer <i>Nanog</i> expression  |
| 328   | TCCAAGTTGGGTTGGTCCAAGTCT | Reverse primer <i>Nanog</i> expression  |
| 323   | AACCTGGAAGCTGACAGACAGT   | Forward primer <i>Blbp</i> expression   |
| 324   | TCACAGTTGGTTTGGTCACG     | Reverse primer <i>Blbp</i> expression   |
| 333   | AGGCGCTGGAACAGAGATT      | Forward primer <i>Nestin</i> expression |
| 334   | TTCCAGGATCTGAGCGATCT     | Reverse primer <i>Nestin</i> expression |
| 345   | CCTTTTAAAACCGGGAGAGG     | Forward primer <i>Map2</i> expression   |
| 346   | AAGGAGAGTGGGCCTGAACT     | Reverse primer <i>Map2</i> expression   |
| 255   | GGACCAAATACACAGATGGCCTA  | <i>Xist_CAS_Forward_allele_specific</i> |
| 257   | CATCATTCCGTCCGGTCAAG     | <i>Xist_129_Forward_allele_specific</i> |
| 256   | CTTGGAAGTCACAGGTGCCTGTA  | <i>Xist_Reverse_allele_specific</i>     |

Primers used in this study for gene expression analysis as described in the methods section.

Supplementary Table 3

| OLIGO | SEQUENCE               | DESCRIPTION            |
|-------|------------------------|------------------------|
| 1     | AAAGCCTGTCATCTCCAT     | Set1 chr:103468694     |
| 2     | GTCGCTTATAGTGTGCTG     | Set1 chr:103468399     |
| 3     | AAGACCCTTAAGACGGTTC    | Set2 chr:103580781     |
| 4     | GGCTGACTCAAATAAGGA     | Set2 chr:103580325     |
| 5     | TGTATGCACAGTTATAGCCA   | Set3 chr:103683355     |
| 6     | AGTTTATGTCCATCTCCAGTG  | Set3 chr:103683088     |
| 7     | AAAGGACCCTAAGAAACCATT  | Set4 (pTARBAC2.1:4845) |
| 8     | TTCAAATATGTATCCGCTCATG | Set4 (pTARBAC2.1:4566) |
| 9     | CTTCAGCTTCAAATATCACCC  | Set5 (pTARBAC2.1:7667) |
| 10    | CTGAATATTCTCTCTGGGCC   | Set5 (pTARBAC2.1:7385) |
| 11    | GTTACGGTGCCCTCCAT      | Set6-dsRed             |
| 12    | CGTGATGCAGAAGAAGACCA   | Set6-dsRed             |

Primers used in this study to map the Xist transgenes integration sites by TLA

Supplementary Table 4

| oligos          | sequence                  | description |
|-----------------|---------------------------|-------------|
| 1_Nampt_F1      | CACTTCGGTGGCAGAAATAGAGTA  | Chr.12      |
| 2_Nampt_R1_bio  | TAGCGAGCTCTCTGTGATTGTG    | Chr.12      |
| 3_Nampt_S1      | AGTAGTTACAATAGAGACCA      | Chr.12      |
| 4_Pole2_F1_bio  | GAAACTTCTCCAACACTTGCACCTT | Chr.12      |
| 5_Pole2_R1      | AAGGACGCCATGTTTGTGATT     | Chr.12      |
| 6_Pole2_S1      | CATGTTTGTGATTGTGTCT       | Chr.12      |
| 7_Fcf1_F1       | TTATCATGAGTCCTGCAGAATCG   | Chr.12      |
| 8_Fcf1_R1_bio   | AGTCGTCAGCGTAGGTTTCTT     | Chr.12      |
| 9_Fcf1_S1       | GTCCTGCAGAATCGC           | Chr.12      |
| 10_Pnn_F1_bio   | AGAAGAGAGAAAGCAGGTTGAAAA  | Chr.12      |
| 11_Pnn_R1       | TAGCACGTCTCTCCTCAAACAGTT  | Chr.12      |
| 12_Pnn_S1       | GTCTCTCCTCAAACAGTTC       | Chr.12      |
| 13_Tcl1_1F      | GAGTTTTCTTCTTGGAGCCCAGTG  | Chr.12      |
| 14_Tcl1_1R_bio  | CCACAGGGGAGATGTTGGTACTTA  | Chr.12      |
| 15_Tcl1_1S      | GACATGACTAGCGAACAG        | Chr.12      |
| 16_Glrx5_F1     | TCGGGGCCAGAAAAGCCT        | Chr.12      |
| 17_Glrx5_R1_bio | CCCGCTTGCTGCCAGGAG        | Chr.12      |
| 18_Glrx5_s1     | GTTGCTGTGATGCTTG          | Chr.12      |
| 19_Abcb7_R1_bio | AGCCACATCAGGAAATTGAAGTC   | Chr.X       |
| 20_Abcb7_F1     | AATGATTATGTGGCAAGTCACG    | Chr.X       |
| 21_Abcb7_S1     | GGTCTTCCTATATTGTCCA       | Chr.X       |
| 22_Rnf12_R1_bio | GGAGAATACCGGCAGAGAGATA    | Chr.X       |
| 23_Rnf12_F1     | TGTTGTTCCGGAGCCTGAGAT     | Chr.X       |
| 24_Rnf12_S1     | CCTGAGATCTTGATCGAGT       | Chr.X       |

Primers used in this study for RT-PCR amplification followed by pyrosequencing.
